# Supplementary material
Source: PubMed Central journal article supplement (PMC5327841)

**Supplementary Material: Association of genetic variation in the tachykinin receptor 3 locus with hot flashes and night sweats in the Women’s Health Initiative Study**

Carolyn J. Crandall, JoAnn E. Manson, Chancellor Hohensee, Steve Horvath, Jean Wactawski-Wende, Erin S. LeBlanc, Mara Z. Vitolins, Rami Nassir, Janet S. Sinsheimer

**The Harmonization and Imputation Effort of Women’s Health Initiative Genome Wide Association Studies** (available at [http://www.ncbi.nlm.nih.gov/projects/gap/cgi-bin/study.cgi?study\\_id=phs000746.v1.p3](http://www.ncbi.nlm.nih.gov/projects/gap/cgi-bin/study.cgi?study_id=phs000746.v1.p3))

These studies jointly involved over 30,000 samples, alignment ("flipping") to the same reference panel, imputation to the 1000 genomes, identification of genetically related individuals, and computations of principal components and comparison with self-reported ethnicity.

The harmonization/imputation effort involves 6 GWAS, as described in the table below.

| (WHI Study #)                         | Hip Fracture GWAS (BA3)                                    | SHARe (M5)                    | GARNET (M13)                                                      | WHIMS+ (W63)                     | GECCO (AS224)                               | MOPMAP (AS264)                                                                                     |
|---------------------------------------|------------------------------------------------------------|-------------------------------|-------------------------------------------------------------------|----------------------------------|---------------------------------------------|----------------------------------------------------------------------------------------------------|
| Directly genotyped GWAS data on dbGaP | No                                                         | Yes                           | Yes                                                               | Data uploaded to dbGaP June 2013 | No                                          | No                                                                                                 |
| Study that funded GWAS                | WHI-BAA3 National Heart, Lung, and Blood Institute (NHLBI) | NHLBI                         | WHI-GARNET - National Human Genome Research Institute (NHGRI)     | NHLBI                            | WHI-AS224 - National Cancer Institute (NCI) | WHI-AS264 - National Institute of Environmental Health Sciences (NIEHS) and Univ of North Carolina |
| GWAS platform                         | Illumina 550K and 610K                                     | Affymetrix 6.0                | Illumina HumanOmni1-Quad v1- B                                    | HumanOmniExpress Exome-8v1_B     | Illumina 610 and Cytochip 370K              | Affymetrix Gene Titan, Axion Genome-Wide Human CEU I Array Plate                                   |
| Design                                | Case-control                                               | Cohort                        | Case-control (4 case groups)                                      | Cohort                           | Case-control                                | Case-Control                                                                                       |
| Phenotype for cases                   | Hip Fracture                                               | NA                            | Type 2 Diabetes, Myocardial Infarction, Stroke, Venous Thrombosis | NA                               | Colorectal cancer                           | Ventricular Ectopy (ever)                                                                          |
| Other sample details                  | NA                                                         | Minorities                    | Hormone Therapy Clinical Trial                                    | Hormone Therapy Clinical Trial   | NA                                          | Controls selected within centers, years, seasons and visit years in which cases originated         |
| Ethnicity                             | Mostly white                                               | African American and Hispanic | Mostly white                                                      | White                            | White                                       | White                                                                                              |
| Sample                                | 3690                                                       | 11992                         | 4883                                                              | 5687                             | 2493                                        | 3069                                                                                               |

|       |  |  |  |  |  |  |
|-------|--|--|--|--|--|--|
| size* |  |  |  |  |  |  |
|-------|--|--|--|--|--|--|

\*The sample sizes are the number of samples after QC that are available on dbGaP. Note that there are some subjects that are in multiple studies, as detailed below.

#For some of the data files these two platforms are considered different studies.

## Initial QC

Initial QC had already been carried out on each of the GWAS studies, using the GENEVA protocol or protocols that were very similar. Some of the pertinent QC parameters used for each of the studies are shown in the table below.

|                                                              | Hip Fracture GWAS             | SHARe                                                     | GARNET                                  | WHIMS+ | GECCO    | MOPMAP |
|--------------------------------------------------------------|-------------------------------|-----------------------------------------------------------|-----------------------------------------|--------|----------|--------|
| Minimal sample call rate                                     | 98%                           | 95%                                                       | 98%                                     | 97%    | 97%      | 95%    |
| Minimal SNP call rate                                        | 98%                           | 90%                                                       | 98%                                     | 98%    | 98%      | 90%    |
| Hardy Weinberg P-value cut-off below which SNPs are excluded | 1e-4                          | 1e-6                                                      | 1e-4                                    | 1e-4   | 1e-4     | 1e-6   |
| Samples used for Hardy Weinberg calculations                 | Controls of European-ancestry | All samples, separate for Hispanics and African Americans | Unrelated controls of European-ancestry | All    | Controls | All    |
| Minimum allele frequency cut-off                             | 1%                            | 1%                                                        | None                                    | 1%     | 5%       | 0.5%   |

## Imputation

The imputation was done using the following procedures.

1. Match the strand of the GWAS data with the 1KGP data by comparing the letters of the alleles (ambiguous A/T or C/G SNPs were excluded).
2. We used the 1kGP reference panel (1092 samples; v2.20101123 for GECCO; v3.20101123 for GARNET, HIPFX, MOPMAP, WHIMS+).
3. The GWAS data were first split into chunks. Each chunk has 10000 SNPs and neighboring chunks have 1000 overlapping SNPs. Then all chunks were phased using Beagle and then combined using mergebeaglechunks.jar (available from the BEAGLE website).
4. An autoclip file was created for minimac to specify what the range of the chunks (start and stop) and the SNPs to be imputed within the chunk (core\_start and core\_end) so that no SNP needs to be imputed twice. All chunks were imputed into 1kGP using minimac.
5. SNPs that could not be imputed with high enough confidence (cut-off  $R^2 > 0.1$ ) were omitted for that particular study (but still appear as columns of missing data in files if they were kept in the other studies, to facilitate alignment).
6. We did not impute the X chromosome.

The SHARe study was independently imputed to the same reference panel. The procedures used were similar to those listed above, except that MACH was used to carry out the imputation.

## Harmonization

1. A panel of 5665 SNPs was used for checking the pairwise concordance among all samples in GARNET, GECCO, HIPFX, SHARe, WHIMS+ and MOPMAP.

2. The same panel of SNPs was used for principal component check together with HapMap samples to identify ethnicity outliers.
3. The same panel of SNPs were used for checking IBD in plink to identify relatedness among samples.
4. Another PC analysis was done for combined samples (after removing of ineligible duplicates) in all studies then the resulting PCs were mapped back to samples within each study.
5. A netcdf file of imputed results was created for each chromosome in each study. Different studies have the same set of SNPs - SNPs that were not successfully imputed in a particular study but are in other studies are listed as missing values.
6. A SNP info file was also created along with each netcdf file describing the SNP name, chromosome, position, count allele, alternative allele, count allele frequency, and imputation quality for each SNP.

## Duplicates

As subjects for each of these GWAS were selected independently we checked for duplicates between the studies. We removed a small number of samples that

- were supposed to be duplicates but had a concordance rate smaller than 90%; and
- appeared duplicates but were from unrelated individuals, who appeared not to be monozygotic twins.

We kept samples that

- were monozygotic twins (see relatedness below), and
- duplicates between studies

in our data sets. There currently are 29846 unique subjects in the data.

## Relatedness

We carried out an IBD analysis using a subset of 5665 SNPS and the Plink package. We used the results to identify 42 parent off-spring pairs and 303 pairs of siblings/first degree relatives. These, together with the 5 pairs of monozygotic twins are listed in the file "*WHI\_GWAS\_relatedness\_information.csv*", which lists all pairs of related individual. We did not identify second and higher degree relatives (e.g. cousins, half-sibs etc).

**Supplemental Table 1. Chromosomal locations, reference SNP cluster identification number (rs number), function, and affected alleles**

| Chromosome | Gene <sup>a</sup>  | Start position in chromosome | End position in chromosome | rs number <sup>b</sup><br>uniform resource locator (url) in the dbSNP database                                                                 | Function <sup>c</sup> | Reference genomic sequence | Observed alleles |
|------------|--------------------|------------------------------|----------------------------|------------------------------------------------------------------------------------------------------------------------------------------------|-----------------------|----------------------------|------------------|
| 4          | TACR3 <sup>d</sup> | 104556731                    | 104556732                  | rs74827081<br><a href="http://www.ncbi.nlm.nih.gov/SNP/snp_ref.cgi?rs=74827081">http://www.ncbi.nlm.nih.gov/SNP/snp_ref.cgi?rs=74827081</a>    | intron                | G                          | C,G              |
| 4          | TACR3              | 104584257                    | 104584258                  | rs74589515<br><a href="http://www.ncbi.nlm.nih.gov/SNP/snp_ref.cgi?rs=74589515">http://www.ncbi.nlm.nih.gov/SNP/snp_ref.cgi?rs=74589515</a>    | intron                | T                          | G,T              |
| 4          | TACR3              | 104580808                    | 104580809                  | rs79246187<br><a href="http://www.ncbi.nlm.nih.gov/SNP/snp_ref.cgi?rs=79246187">http://www.ncbi.nlm.nih.gov/SNP/snp_ref.cgi?rs=79246187</a>    | intron                | C                          | C,T              |
| 4          | TACR3              | 104575472                    | 104575473                  | rs112390256<br><a href="http://www.ncbi.nlm.nih.gov/SNP/snp_ref.cgi?rs=112390256">http://www.ncbi.nlm.nih.gov/SNP/snp_ref.cgi?rs=112390256</a> | intron                | G                          | A,G              |
| 4          | TACR3              | 104584996                    | 104584997                  | rs75544266<br><a href="http://www.ncbi.nlm.nih.gov/SNP/snp_ref.cgi?rs=75544266">http://www.ncbi.nlm.nih.gov/SNP/snp_ref.cgi?rs=75544266</a>    | intron                | C                          | C,T              |
| 4          | TACR3              | 104562839                    | 104562840                  | rs78154848<br><a href="http://www.ncbi.nlm.nih.gov/SNP/snp_ref.cgi?rs=78154848">http://www.ncbi.nlm.nih.gov/SNP/snp_ref.cgi?rs=78154848</a>    | intron                | T                          | C,T              |
| 4          | TACR3              | 104562841                    | 104562842                  | rs76643670<br><a href="http://www.ncbi.nlm.nih.gov/SNP/snp_ref.cgi?rs=76643670">http://www.ncbi.nlm.nih.gov/SNP/snp_ref.cgi?rs=76643670</a>    | intron                | T                          | A,T              |
| 4          | TACR3              | 104580154                    | 104580155                  | rs78289784<br><a href="http://www.ncbi.nlm.nih.gov/SNP/snp_ref.cgi?rs=78289784">http://www.ncbi.nlm.nih.gov/SNP/snp_ref.cgi?rs=78289784</a>    | intron                | C                          | A,C              |
| 4          | TACR3              | 104569675                    | 104569676                  | rs77322567<br><a href="http://www.ncbi.nlm.nih.gov/SNP/snp_ref.cgi?rs=77322567">http://www.ncbi.nlm.nih.gov/SNP/snp_ref.cgi?rs=77322567</a>    | intron                | C                          | A,C              |
| 4          | TACR3              | 104593976                    | 104593977                  | rs78141901<br><a href="http://www.ncbi.nlm.nih.gov/SNP/snp_ref.cgi?rs=78141901">http://www.ncbi.nlm.nih.gov/SNP/snp_ref.cgi?rs=78141901</a>    | intron                | C                          | A,C              |
| 4          | TACR3              | 104600028                    | 104600029                  | rs78844131<br><a href="http://www.ncbi.nlm.nih.gov/SNP/snp_ref.cgi?rs=78844131">http://www.ncbi.nlm.nih.gov/SNP/snp_ref.cgi?rs=78844131</a>    | intron                | T                          | G,T              |
| 4          | TACR3              | 104628586                    | 104628587                  | rs79852843<br><a href="http://www.ncbi.nlm.nih.gov/SNP/snp_ref.cgi?rs=79852843">http://www.ncbi.nlm.nih.gov/SNP/snp_ref.cgi?rs=79852843</a>    | intron                | T                          | C,T              |
| 4          | TACR3              | 104612446                    | 104612447                  | rs80328778<br><a href="http://www.ncbi.nlm.nih.gov/SNP/snp_ref.cgi?rs=80328778">http://www.ncbi.nlm.nih.gov/SNP/snp_ref.cgi?rs=80328778</a>    | intron                | C                          | C,T              |
| 4          | TACR3              | 104623713                    | 104623714                  | rs112623956<br><a href="http://www.ncbi.nlm.nih.gov/SNP/snp_ref.cgi?rs=112623956">http://www.ncbi.nlm.nih.gov/SNP/snp_ref.cgi?rs=112623956</a> | intron                | A                          | A,G              |

<sup>a</sup> Information obtained from the dbSNP database, maintained by the National Center for Biotechnology Information, U.S. National Library of Medicine, <http://www.ncbi.nlm.nih.gov/SNP/>, except for start and end positions in chromosome, which were obtained from the UCSF genome browser maintained by the University of California Santa Cruz (<http://www.genome.ucsc.edu/index.html>)

<sup>b</sup> Rs number denotes dbSNP reference SNP (rs) identifier and corresponding url for dbSNP information.

<sup>c</sup> Functional category of the single-nucleotide polymorphism

<sup>d</sup> TACR3 denotes tachykinin receptor 3

**Supplemental Table 2. Observed minor allele frequencies for the statistically significant single-nucleotide polymorphisms <sup>a</sup>**

| rs number                   | Allele frequencies <sup>b</sup> GARNET study | Allele frequencies SHARe-AA study | Allele frequencies SHARe-HA study | Allele frequencies WHIMS+ study |
|-----------------------------|----------------------------------------------|-----------------------------------|-----------------------------------|---------------------------------|
| <a href="#">rs74827081</a>  | 0.061                                        | 0.013                             | 0.046                             | 0.056                           |
| <a href="#">rs74589515</a>  | 0.061                                        | 0.013                             | 0.045                             | 0.055                           |
| <a href="#">rs79246187</a>  | 0.061                                        | 0.019                             | 0.046                             | 0.055                           |
| <a href="#">rs112390256</a> | 0.06                                         | 0.019                             | 0.046                             | 0.055                           |
| <a href="#">rs75544266</a>  | 0.061                                        | 0.019                             | 0.046                             | 0.055                           |
| <a href="#">rs78154848</a>  | 0.061                                        | 0.017                             | 0.047                             | 0.055                           |
| <a href="#">rs76643670</a>  | 0.061                                        | 0.017                             | 0.047                             | 0.055                           |
| <a href="#">rs78289784</a>  | 0.061                                        | 0.018                             | 0.046                             | 0.055                           |
| <a href="#">rs77322567</a>  | 0.061                                        | 0.043                             | 0.049                             | 0.056                           |
| <a href="#">rs78141901</a>  | 0.056                                        | 0.011                             | 0.035                             | 0.048                           |
| <a href="#">rs78844131</a>  | 0.056                                        | 0.017                             | 0.036                             | 0.048                           |
| <a href="#">rs79852843</a>  | 0.054                                        | 0.011                             | 0.034                             | 0.047                           |
| <a href="#">rs80328778</a>  | 0.055                                        | 0.015                             | 0.035                             | 0.047                           |
| <a href="#">rs112623956</a> | 0.055                                        | 0.014                             | 0.035                             | 0.047                           |
| <a href="#">rs75699757</a>  | 0.162                                        | 0.034                             | 0.101                             | 0.161                           |
| <a href="#">rs11518508</a>  | 0.167                                        | 0.034                             | 0.103                             | 0.167                           |
| <a href="#">rs148680409</a> | 0.000                                        | 0.004                             | 0.001                             | 0.000                           |

<sup>a</sup> The frequencies refer to the count allele vs the “baseline” allele. The imputed dosages are the expected number of the count alleles – i.e. E[# of count alleles]. GARNET Study denotes the Genome-wide Association Studies of Treatment Response in Randomized Clinical Trials cohort of European American women. SHARe-AA Study denotes the SNP Health Association Resource cohort African American women. SHARe-HA Study denotes the SNP Health Association Resource cohort Hispanic American women. WHIMS+ Study denotes the Women’s Health Initiative Memory Study cohort of European American women.

<sup>b</sup> Frequency of reference allele listed first

**Supplemental Table 3. Genome-wide association study (GWAS) results by study sample and combined in meta-analysis: Vasomotor symptoms ever vs. never among women who never used menopausal hormone therapy<sup>a</sup>**

| Refsnp <sup>b</sup>         | CHR:POS <sup>c</sup> | GARNET      |         | SHARe - AA  |         | SHARe - HA  |         | WHIMS+      |         | Meta pval |
|-----------------------------|----------------------|-------------|---------|-------------|---------|-------------|---------|-------------|---------|-----------|
|                             |                      | OR (SE)     | p-value |           |
| <a href="#">rs74827081</a>  | 4:104556732          | 1.54 (0.21) | 1.56e-3 | 1.99 (0.48) | 3.80e-3 | 2.02 (0.42) | 6.53e-4 | 1.55 (0.17) | 1.14e-4 | 6.33e-11  |
| <a href="#">rs74589515</a>  | 4:104584258          | 1.48 (0.20) | 4.04e-3 | 2.02 (0.46) | 1.93e-3 | 1.91 (0.38) | 1.20e-3 | 1.58 (0.18) | 6.22e-5 | 7.95e-11  |
| <a href="#">rs79246187</a>  | 4:104580809          | 1.49 (0.20) | 3.38e-3 | 1.59 (0.30) | 1.50e-2 | 1.91 (0.38) | 1.21e-3 | 1.58 (0.18) | 5.45e-5 | 2.31e-10  |
| <a href="#">rs112390256</a> | 4:104575473          | 1.53 (0.21) | 1.83e-3 | 1.57 (0.30) | 2.08e-2 | 1.97 (0.40) | 8.67e-4 | 1.55 (0.17) | 9.62e-5 | 2.39e-10  |
| <a href="#">rs75544266</a>  | 4:104584997          | 1.48 (0.20) | 4.19e-3 | 1.60 (0.30) | 1.25e-2 | 1.92 (0.38) | 1.16e-3 | 1.58 (0.18) | 6.12e-5 | 2.70e-10  |
| <a href="#">rs76643670</a>  | 4:104562842          | 1.54 (0.21) | 1.58e-3 | 1.46 (0.29) | 6.33e-2 | 2.00 (0.41) | 6.81e-4 | 1.55 (0.17) | 1.12e-4 | 6.01e-10  |
| <a href="#">rs78154848</a>  | 4:104562840          | 1.54 (0.21) | 1.58e-3 | 1.46 (0.29) | 6.33e-2 | 2.00 (0.41) | 6.82e-4 | 1.55 (0.17) | 1.12e-4 | 6.01e-10  |
| <a href="#">rs78289784</a>  | 4:104580155          | 1.49 (0.20) | 3.33e-3 | 1.48 (0.29) | 4.28e-2 | 1.92 (0.39) | 1.18e-3 | 1.57 (0.18) | 6.93e-5 | 7.59e-10  |
| <a href="#">rs77322567</a>  | 4:104569676          | 1.53 (0.21) | 1.63e-3 | 1.23 (0.16) | 1.21e-1 | 1.88 (0.37) | 1.58e-3 | 1.54 (0.17) | 1.18e-4 | 6.88e-9   |
| <a href="#">rs78141901</a>  | 4:104593977          | 1.31 (0.19) | 5.98e-2 | 2.05 (0.51) | 4.09e-3 | 1.51 (0.36) | 8.49e-2 | 1.65 (0.20) | 2.81e-5 | 6.10e-8   |
| <a href="#">rs79852843</a>  | 4:104628587          | 1.34 (0.19) | 3.81e-2 | 1.73 (0.42) | 2.24e-2 | 1.39 (0.32) | 1.56e-1 | 1.68 (0.20) | 1.34e-5 | 8.84e-8   |
| <a href="#">rs112623956</a> | 4:104623714          | 1.32 (0.19) | 5.06e-2 | 1.75 (0.38) | 1.10e-2 | 1.35 (0.31) | 2.01e-1 | 1.67 (0.20) | 1.60e-5 | 1.07e-7   |
| <a href="#">rs78844131</a>  | 4:104600029          | 1.31 (0.19) | 5.66e-2 | 1.63 (0.34) | 2.04e-2 | 1.49 (0.35) | 8.50e-2 | 1.66 (0.20) | 2.51e-5 | 1.18e-7   |
| <a href="#">rs74409348</a>  | 4:104671482          | 1.34 (0.19) | 3.88e-2 | 1.44 (0.34) | 1.24e-1 | 1.39 (0.31) | 1.50e-1 | 1.63 (0.19) | 1.98e-5 | 4.24e-7   |
| <a href="#">rs80328778</a>  | 4:104612447          | 1.33 (0.19) | 4.65e-2 | 1.48 (0.33) | 7.66e-2 | 1.39 (0.33) | 1.58e-1 | 1.67 (0.20) | 1.65e-5 | 3.40e-7   |
| <a href="#">rs7162254</a>   | 15:50511240          | 0.80 (0.08) | 1.81e-2 | 0.83 (0.05) | 2.67e-3 | 0.88 (0.11) | 3.01e-1 | 0.80 (0.06) | 1.56e-3 | 5.16e-7   |
| <a href="#">rs12600555</a>  | 17:76944775          | 1.23 (0.13) | 4.54e-2 | 1.22 (0.12) | 3.37e-2 | 1.56 (0.23) | 2.59e-3 | 1.27 (0.10) | 2.21e-3 | 6.34e-7   |
| <a href="#">rs190024608</a> | 11:127149749         | 1.68 (0.51) | 8.84e-2 | 3.58 (1.41) | 1.22e-3 | 2.47 (1.68) | 1.83e-1 | 2.35 (0.61) | 9.49e-4 | 1.12e-6   |
| <a href="#">rs1370264</a>   | 16:66387751          | 1.14 (0.08) | 5.62e-2 | 1.09 (0.06) | 9.16e-2 | 1.16 (0.10) | 6.56e-2 | 1.23 (0.06) | 8.89e-5 | 1.95e-6   |
| <a href="#">rs2005727</a>   | 16:66389438          | 1.13 (0.07) | 7.56e-2 | 1.09 (0.06) | 1.01e-1 | 1.17 (0.10) | 5.07e-2 | 1.23 (0.06) | 7.99e-5 | 2.30e-6   |

<sup>a</sup> Top 20 results from the meta-analysis of data from all 3 GWAS studies. Odds ratio (OR) is expressed as allelic OR (standard error). Reference group is “never had vasomotor symptoms”. Adjusted for bilateral oophorectomy, time since menopause, smoking, alcohol intake, physical activity, population structure, body mass index, education, income, and menopausal estrogen therapy use. GARNET Study denotes the Genome-wide Association Studies of Treatment Response in Randomized Clinical Trials cohort of women of non-Hispanic European ancestry. SHARe-AA Study denotes the SNP Health Association Resource cohort African American women. SHARe-HA Study denotes the SNP Health Association Resource cohort Hispanic American women. WHIMS+ Study denotes the Women’s Health Initiative Memory Study cohort of women of non-Hispanic European ancestry.

<sup>b</sup> Refsnp identification numbers (IDs) were obtained from the [SNP locations for Homo sapiens \(dbSNP Build 144\)](#) Bioconductor package.

<sup>c</sup> CHR:POS denotes chromosome assignment and position of SNP according to Build 37.

**Figure legends**

**Supplemental Fig. 1. Quantile-quantile plot for meta-analysis of genome-wide associations studies of vasomotor symptoms in the Women's Health Initiative Study after removal of the 14 most significant signals.**

**Supplemental Fig. 2. Regional Manhattan plot of single-nucleotide polymorphisms (SNPs) on chromosome 4. Blue line denotes p-value below  $5 \times 10^{-5}$ ; red line denotes p-value below  $5 \times 10^{-8}$ .**

**Supplemental Fig. 1. Quantile-quantile plot for meta-analysis of genome-wide association studies of vasomotor symptoms in the Women's Health Initiative Study**

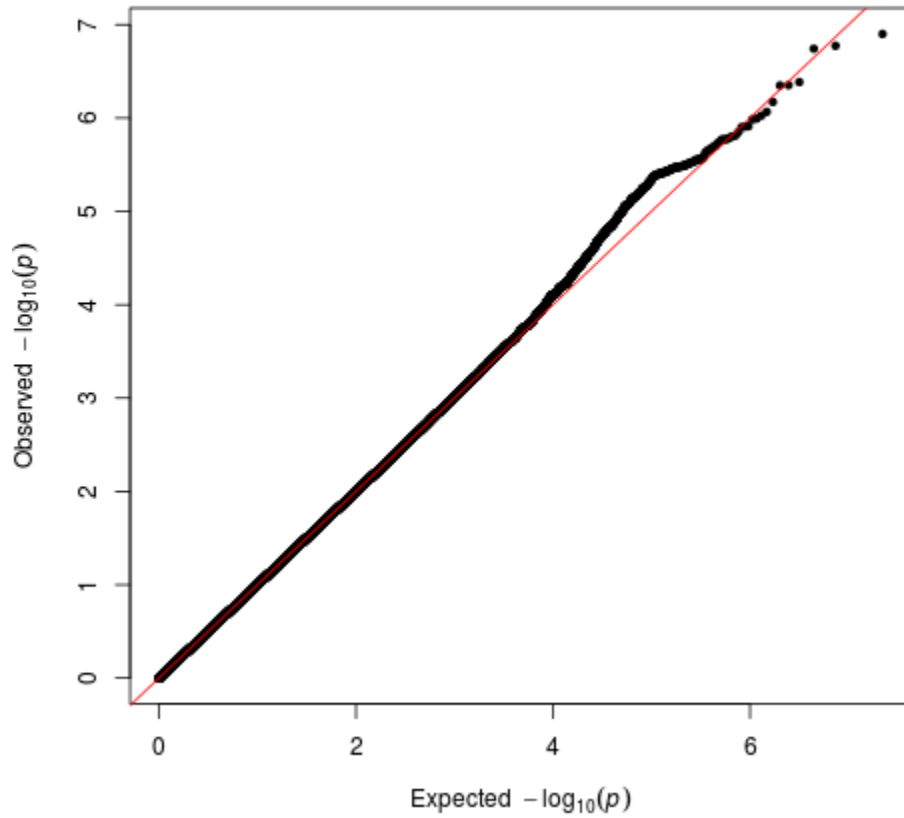

**Lambda: 0.9987071**



Supplemental Fig. 2. Regional Manhattan plot of single-nucleotide polymorphisms (SNPs) on chromosome 4.

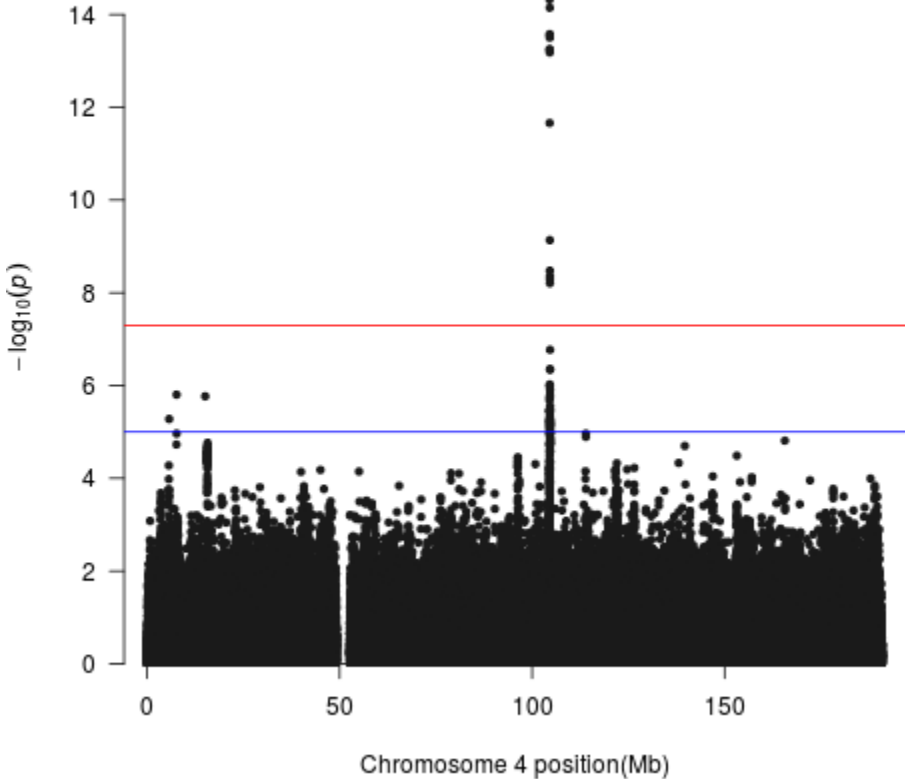

Supplement: NIHMS811518-supplement-Supplemental_Data_File___doc___tif__pdf__etc__.pdf [file NIHMS811518-supplement-Supplemental_Data_File___doc___tif__pdf__etc__.pdf]
